# Supplementary material
Source: PubMed Central journal article supplement (PMC6983851)
Supplement: supp_RA119.008854_144760_3_supp_443215_q2v7hh.pdf [file supp_RA119.008854_144760_3_supp_443215_q2v7hh.pdf]

SMARCAD1-mediated recruitment of the DNA mismatch repair protein MutL $\alpha$  to MutS $\alpha$  on damaged chromatin induces apoptosis in human cells

**Yukimasa Takeishi<sup>1</sup>, Ryosuke Fujikane<sup>2</sup>, Mihoko Rikitake<sup>2,3</sup>, Yuko Obayashi<sup>2,4</sup>, Mutsuo Sekiguchi<sup>1</sup>, and Masumi Hidaka<sup>2,\*</sup>**

From the <sup>1</sup>Advanced Science Research Center, Fukuoka Dental College, Fukuoka, 814-0193, Japan; <sup>2</sup>Department of Physiological Science and Molecular Biology, Fukuoka Dental College, Fukuoka, 814-0193, Japan; <sup>3</sup>Department of Oral Growth and Development, Fukuoka Dental College, Fukuoka, 814-0193, Japan; <sup>4</sup>Department of Oral and Maxillofacial Surgery, Fukuoka Dental College, Fukuoka, 814-0193, Japan

### **Supporting Information**

**FIGURE S1**

**FIGURE S2**

**FIGURE S3**

**FIGURE S4**

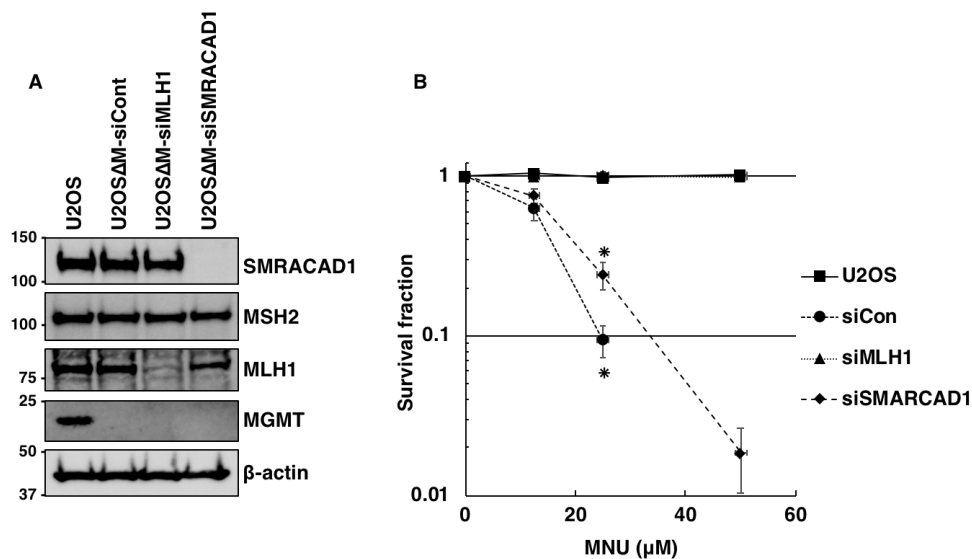

**FIGURE S1. The sensitivity of *SMARCAD1*-knockdown U2OS-derived cells to MNU.** A. The expression of *SMARCAD1* and mismatch repair (MMR) proteins in U2OS-derived cells. The whole-cell extracts prepared from U2OS, *MGMT*-knockout (U2OSΔM-siCont), *MLH1*-knockdown (U2OSΔM-siMLH1) and *SMARCAD1*-knockdown (U2OSΔM-siSMARCAD1) cells were subjected to immunoblotting to detect *SMARCAD1* and MMR proteins using specific antibodies. β-actin was a loading control. The molecular weights ( $\times 10^{-3}$ ) are indicated on the left of the panels. B. The survival fraction of four types of cells after MNU treatment. The cells were treated with MNU for 1 h and then incubated in a drug-free medium for 10 days. The number of colonies was counted, and the survival fractions were determined. Values are the means of at least three independent experiments, and error bars are  $\pm$ SEM. Asterisks indicate significant differences ( $p < 0.05$ ).

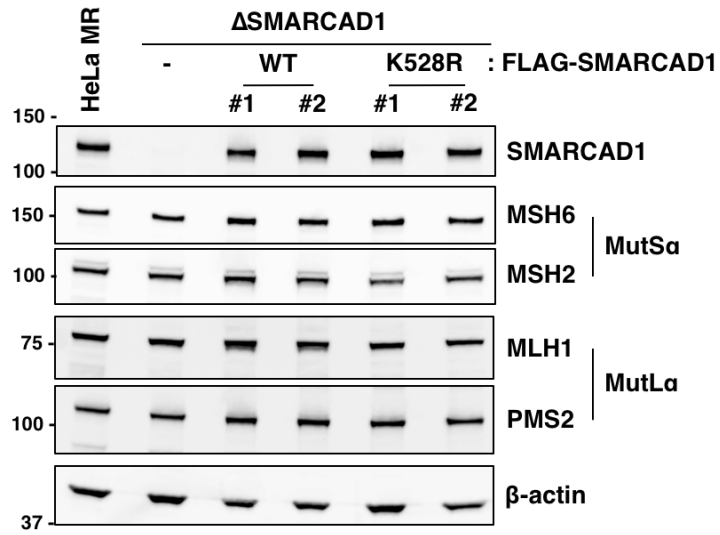

**FIGURE S2. The expression of SMARCAD1 and mismatch repair proteins.** Whole-cell extracts prepared from cells expressing exogenous wild- or mutant-type SMARCAD1 were subjected to immunoblotting to detect SMARCAD1 and MMR proteins using specific antibodies.  $\beta$ -actin was a loading control. The molecular weights ( $\times 10^{-3}$ ) are indicated on the left of the panels.

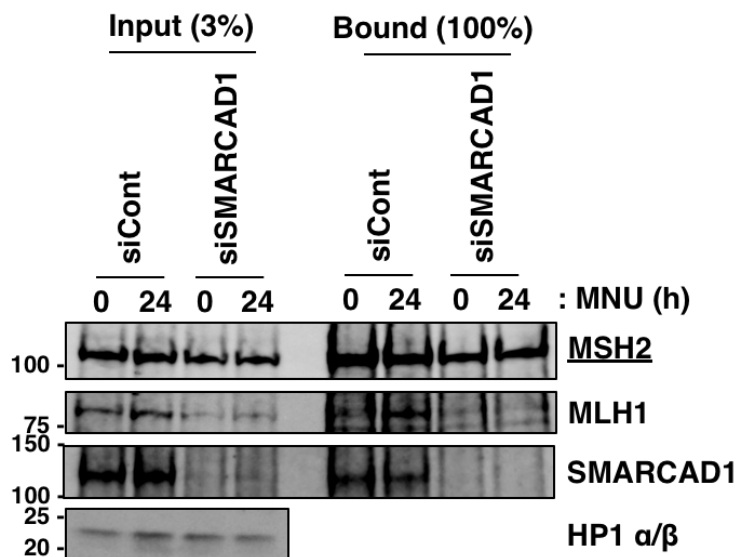

**FIGURE S3. The effects of *SMARCAD1*-knockdown on the formation of MMR complex in *MGMT*-knockout U2OS cells.** The siRNA-transfected cells were exposed to 0.2 mM MNU and harvested at 24 h after the treatment. The chromatin extracts (Input) were used for immunoprecipitation with anti-MSH2 antibody beads. The materials (Bound) were subjected to SDS-PAGE, and immunoblotted using the indicated antibodies. The molecular weights ( $\times 10^{-3}$ ) are indicated on the left of the panels.

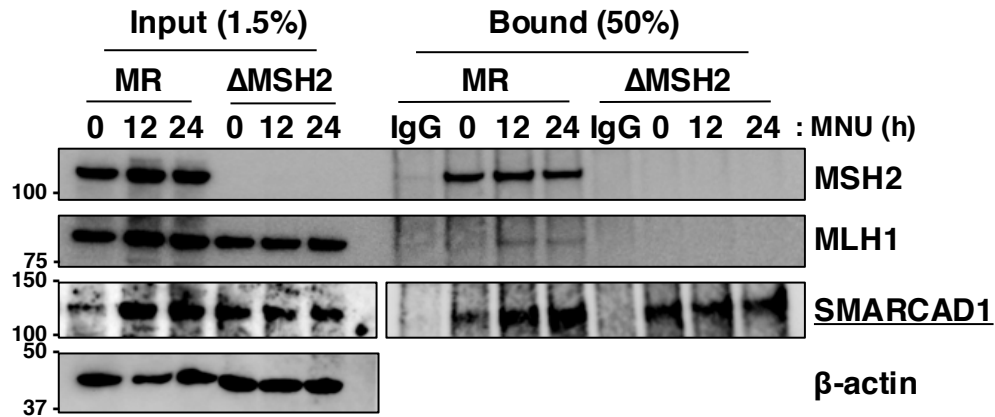

**FIGURE S4. The effects of *MSH2*-knockout on the interaction of *SMARCAD1* with *MLH1* after MNU treatment.** The cells were exposed to 0.2 mM MNU and harvested at 0, 12 and 24 h after the treatment. The whole cell extracts (Input) were used for immunoprecipitation with anti-*SMARCAD1* antibody beads. The materials (Bound) were subjected to SDS-PAGE and immunoblotted using the indicated antibodies. The molecular weights ( $\times 10^{-3}$ ) are indicated on the left of the panels.
